9. 74-yr-old male who suffered an ischemic stroke 2 yr ago presents with stable calf claudication after two blocks that limits exertion, uncontrolled hypertension, and uncontrolled insulin-dependent diabetes is scheduled for elective ileo-femoral bypass. Patient states he does not think he has any heart issues and has not visited a cardiologist since his stroke. The patient's preoperative vital signs are T: 36.5, HR: 98, BP: 165/85, RR: 18.

Multiple choice:

- Proceed to planned surgery.
- Patient needs to have PFTs before I make recommendation.
- Proceed to surgery with heart rate control or consider noninvasive testing if it will change management.
- Delay surgery overnight to collect records from outside providers.
- Obtain immediate cardiology consultation.

## ANESTHESIOLOGY REFLECTIONS FROM THE WOOD LIBRARY-MUSEUM

### Advertising Maltine with Coca Wine

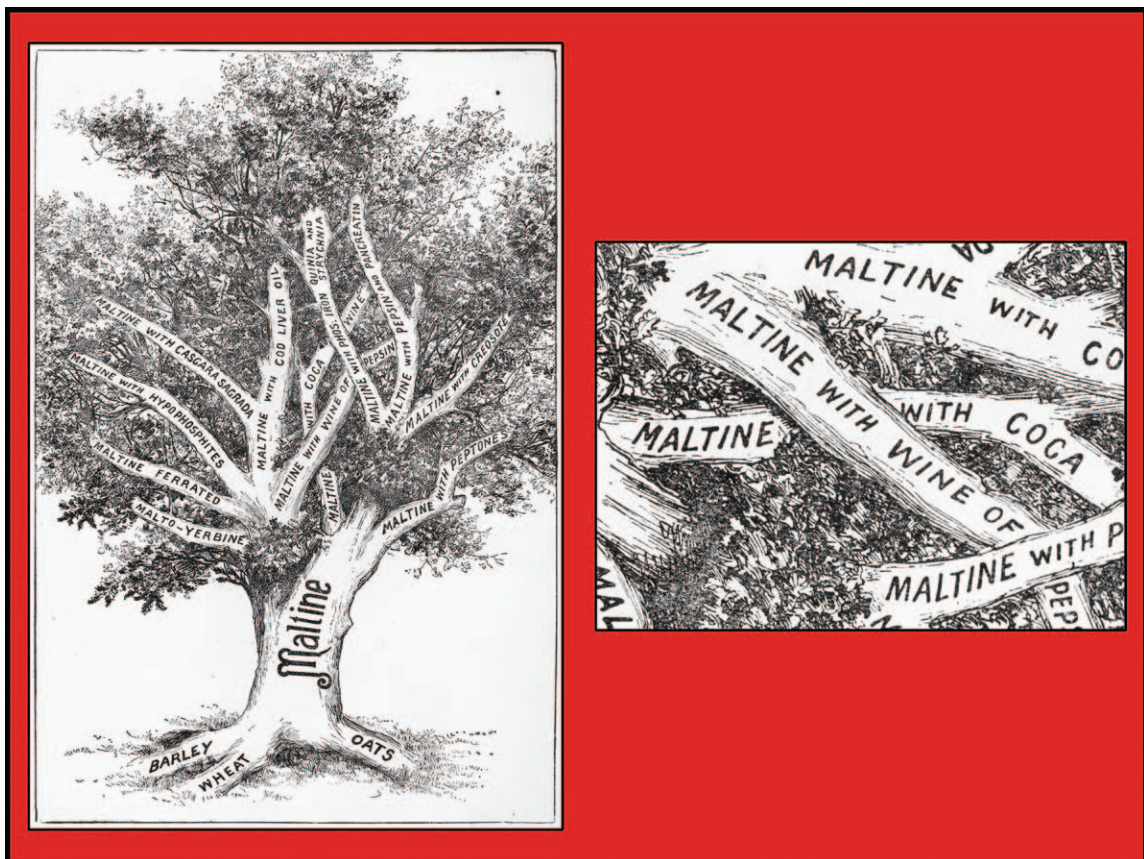

The roots of the Maltine tree (left) were advertised as “concentrated extract of malted wheat, oats, and barley.” A major branch of the Maltine tree was the tonic “Maltine with Coca Wine,” each ounce of which contains “thirty grains of assayed Huanaco Coca leaves...” According to an 1894 issue of the *National Medical Review*, the “Coca boosts the patient and the maltine furnishes the peg that prevents him from slipping back.” Because Maltine had been widely distributed to the public as a stimulant in beverages and in foods (such as Maltine with Coca Wine), cocaine was rapidly accepted by laymen when used as a local anesthetic by dentists and physicians. (Copyright © the American Society of Anesthesiologists, Inc.)

George S. Bause, M.D., M.P.H., Honorary Curator, ASA's Wood Library-Museum of Anesthesiology, Park Ridge, Illinois, and Clinical Associate Professor, Case Western Reserve University, Cleveland, Ohio. UJYC@aol.com.
